# Supplementary material for: Unlocking the potential of senescence-related gene signature as a diagnostic and prognostic biomarker in sepsis: insights from meta-analyses, single-cell RNA sequencing, and in vitro experiments
Source: publisher site journal article supplement (doi:10.18632/aging.205574), 2024-02-26
Supplement: Supplementary file [file aging-v16i4-205574-supplementary-material-SD4.pdf]

**Supplementary Table 2. The detailed information of the datasets downloaded from the GEO.**

| <b>ID</b> | <b>Platform</b>      | <b>Experimental type</b> | <b>Tissue</b> | <b>Sample size (control/sepsis)</b> | <b>Region</b> | <b>PMID</b> |
|-----------|----------------------|--------------------------|---------------|-------------------------------------|---------------|-------------|
| GSE4607   | GPL570               | Microarray               | Whole blood   | 15/69                               | USA           | 17374846    |
| GSE9692   | GPL570               | Microarray               | Whole blood   | 15/30                               | USA           | 18460642    |
| GSE13904  | GPL570               | Microarray               | Whole blood   | 18/158                              | USA           | 19325468    |
| GSE26378  | GPL570               | Microarray               | Whole blood   | 21/82                               | USA           | 21738952    |
| GSE26440  | GPL570               | Microarray               | Whole blood   | 32/98                               | USA           | 19624809    |
| GSE28750  | GPL570               | Microarray               | Whole blood   | 20/10                               | Australia     | 21682927    |
| GSE54514  | GPL6947              | Microarray               | Whole blood   | 18/145                              | Australia     | 23807251    |
| GSE57065  | GPL570               | Microarray               | Whole blood   | 25/82                               | France        | 30671061    |
| GSE65682  | GPL13667             | Microarray               | Whole blood   | 42/760                              | Malta         | 26956172    |
| GSE67652  | GPL16699             | Microarray               | Whole blood   | 12/12                               | Brazil        | 26047321    |
| GSE69063  | GPL19983             | Microarray               | Whole blood   | 33/57                               | Australia     | NA          |
| GSE69528  | GPL10558             | Microarray               | Whole blood   | 55/83                               | USA           | 19903332    |
| GSE95233  | GPL570               | Microarray               | Whole blood   | 22/102                              | France        | 30671061    |
| GSE131761 | GPL13497             | Microarray               | Whole blood   | 15/81                               | Spain         | 34144116    |
| GSE175453 | GPL18573<br>GPL24676 | Single-cell<br>RNA-seq   | Whole blood   | 5/4                                 | USA           | 34484194    |

**Supplementary Table 3 The primer sequence adopted in the RT-qPCR experiments.**

| <b>ID</b> | <b>Sequence (5'-3')</b> |
|-----------|-------------------------|
| TGFBI-F   | CACTCTCAAACCTTTACGAGACC |
| TGFBI-R   | CGTTGCTAGGGGCGAAGATG    |
| MAD1L1-F  | TGGACTGGATATTTCTACCTCGG |
| MAD1L1-R  | CCTCACGCTCGTAGTTCCTG    |
| GAPDH-F   | GGAGCGAGATCCCTCCAAAAT   |
| GAPDH-R   | GGCTGTTGTCATACTTCTCATGG |
