# Supplementary material for: Unlocking the potential of senescence-related gene signature as a diagnostic and prognostic biomarker in sepsis: insights from meta-analyses, single-cell RNA sequencing, and in vitro experiments
Source: publisher site journal article supplement (doi:10.18632/aging.205574), 2024-02-26
Supplement: Supplementary file [file aging-v16i4-205574-supplementary-material-SD8.pdf]

**Supplementary Table 8. The AUCs indicated the diagnostic ability of TGFBI, MAD1L1, and SRS in each cohort.**

| <b>Cohort</b> | <b>AUCs</b>  |               |            |
|---------------|--------------|---------------|------------|
|               | <b>TGFBI</b> | <b>MAD1L1</b> | <b>SRS</b> |
| GSE4607       | 0.877        | 0.766         | 0.853      |
| GSE9692       | 0.873        | 0.773         | 0.889      |
| GSE13904      | 0.811        | 0.694         | 0.784      |
| GSE26378      | 0.821        | 0.687         | 0.810      |
| GSE26440      | 0.830        | 0.775         | 0.839      |
| GSE28750      | 0.905        | 0.995         | 0.893      |
| GSE54514      | 0.484        | 0.571         | 0.508      |
| GSE57065      | 0.927        | 0.869         | 0.950      |
| GSE65682      | 0.874        | 0.948         | 0.962      |
| GSE67652      | 0.510        | 0.521         | 0.507      |
| GSE69063      | 0.808        | 0.920         | 0.938      |
| GSE69528      | 0.806        | 0.820         | 0.870      |
| GSE95233      | 0.919        | 0.761         | 0.928      |
| GSE131761     | 0.964        | 0.879         | 0.962      |
